# Supplementary material
Source: publisher site journal article supplement (https://www.dovepress.com/article/441195)
Supplement: Supplementary file 1 [file get_supplementary_file.php]

**Supplemental Material**

**Supplemental Table 1**. CPT, HCPCS, ICD-10, and ICD-9 codes used to identify patients and classify baseline pain conditions, clinical conditions, and comedication/polypharmacy drug classes.

**Supplemental Table 2**. Opioid medication morphine milligram equivalents (MME) conversion factors.

**Supplemental Table 1.** CPT, HCPCS, ICD-10, and ICD-9 codes used to identify patients and classify baseline pain conditions, clinical conditions, and comedication/polypharmacy drug classes.

| **Variable Name** | | **Coding System** | **Codes** |
| --- | --- | --- | --- |
| **Cohort Creation** | | | |
| SCS Generator | | CPT  ICD-10  ICD-9 | 63685  0JH70[B-E]Z, 0JH80[B-E]Z  86.94-86.98 |
| SCS Lead | | CPT  ICD-10  ICD-9 | 63650, 63655  00HU0MZ, 00HU3MZ, 00HV0MZ, 00HV3MZ  03.93 |
| **Exclusion Criteria** | | | |
| SCS Generator Removal | | CPT  ICD-10  ICD-9 | 63688  0JPT0MZ, 0JPT3MZ  86.05 |
| SCS Lead Removal | | CPT  ICD-10  ICD-9 | 63661, 63662  00PU0MZ, 00PU3MZ  03.94 |
| Intrathecal Drug Delivery System | | CPT  HCPCS  ICD-10  ICD-9 | 62350, 62351, 62362, 62365, 62369, 62370, 95990, 95991  S9328  00HU33Z, 00PU03Z, 00PU33Z, 00PU43Z, 00PUX3Z, 0JH80VZ, 0JPT0VZ, 0JPT3VZ  03.90, 86.05, 86.06 |
| Cancer | | ICD-10  ICD-9 | C00.x-C96.x, D00.x-D49.x  140.x-239.x |
| **Baseline Pain Conditions** | | | |
| Arachnoiditis | | ICD-10  ICD-9 | G03.1, G03.9  322.2, 322.9 |
| Back Pain | | ICD-10  ICD-9 | M54.2, M54.5, M54.6, M54.89, M54.9  723.1, 724.1, 724.2, 724.5 |
| Chronic Pain Disorder | | ICD-10  ICD-9 | G89.0, G89.29, G89.4  338.0, 338.29, 338.4 |
| CRPS I | | ICD-10  ICD-9 | G90.51x, G90.52x  337.2x |
| CRPS II | | ICD-10  ICD-9 | G56.4x, G57.7x  354.4, 354.9, 355.71, 355.8, 355.9 |
| Degenerative Disc Disease | | ICD-10  ICD-9 | M41.20, M43.00, M43.10, M46.47, M47.14, M47.16, M47.812, M47.817, M48.00, M48.04, M48.06, M50.20, M50.30, M51.06, M51.26, M51.27, M51.34-M51.37, M51.86, M51.87  721.0, 721.3, 721.4x, 722.0, 722.10, 722.4, 722.5x, 722.6, 722.73, 722.93, 724.00-724.02, 737.30, 738.4 |
| Epidural Fibrosis | | ICD-10  ICD-9 | G96.12  349.2 |
| Limb Pain | | ICD-10  ICD-9 | M79.609  729.5 |
| Peripheral Neuropathy of the Extremities | | ICD-10  ICD-9 | G56.9x, G57.9x  354.9, 355.8 |
| Post Laminectomy Syndrome | | ICD-10  ICD-9 | M96.1  722.8x |
| Radiculopathy | | ICD-10  ICD-9 | M50.1x, M51.1x, M54.1x  722.10, 722.9x, 723.4, 724.4 |
| Lumbar Spine Surgeries | CPT  ICD-10 | 0275T, 11981-11983, 20702, 20703, 22510-22515, 22558, 22585, 22612, 22614, 22630-22634, 22857, 22858, 22862, 22865, 22867-22869, 22870, 62380, 63005, 63017, 63030, 63035, 63042-63048, 63052, 63053, 63076-63078, 63301-63308, 95990, 95991, 96522, 96523  00B20ZZ, 00B[X-Y]0ZZ, 00N[X-Y]0ZZ, 00NY[3-4]ZZ, 00W[U-V]33Z, 01N80ZZ, 01NB0ZZ, 01NB4ZZ, 0JHT03Z, 0JHV03Z, 0JHW03Z, 0JPT03Z, 0JPV03Z, 0JPW03Z, 0JWT3VZ, 0JWV3VZ, 0JWW3VZ, 0NY00ZZ, 0PU437Z, 0PU43JZ, 0PU43KZ, 0QU037Z, 0QU03[J-K]Z, 0QU137Z, 0QU13[J-K]Z, 0RR50JZ, 0RW50JZ, 0SB00ZZ, 0SB20ZZ, 0SG0070-0SG00KJ, 0SG0370-0SG03KJ, 0SG0470-0SG04KJ, 0SG1070-0SG10KJ, 0SG1370-0SG13KJ, 0SG3070-0SG30KJ, 0SG3370-0SG33KJ, 0SH00BZ, 0SP20JZ, 0SP40JZ, 0SR20JZ, 0SR40JZ, 3C1ZX8Z | |
| **Baseline Clinical Conditions** | | | |
| Alcohol Abuse | | ICD-10  ICD-9 | E52, F10.x, G62.1, G72.1, I42.6, K29.x, K70.x, K85.2, K86.x, O99.3x, T51.0x, Z41.4-Z41.41  265.2, 291.x, 303.x, 305.x, 357.5, 425.5, 535.3x, 571.x, 760.71, 980.0, V11.3 |
| Anxiety | | ICD-10  ICD-9 | F40.x, F41.x  300.0x, 300.2x |
| Depression | | ICD-10  ICD-9 | F31.x, F32.x, F33.x, F34.1, F43.x  296.2x, 296.3x, 296.5x, 300.4, 309.x, 311 |
| Non-Alcohol Substance Use Disorder including Opioid Abuse | | ICD-10  ICD-9 | F11.x-F19.x, T40.x  292.x, 304.x, 305.x, 965.x, E850.x, V65.42 |
| Obesity | | ICD-10  ICD-9 | E66.x  278.0x |
| Psychosis | | ICD-10  ICD-9 | F20.x, F22-F25.x, F28, F29, F30.2, F31.2, F31.5, F32.3, F33.3, F44.89  293.8x, 295.x, 296.04, 296.14, 296.44, 296.54, 297.x, 298.x |
| Smoking Status | | CPT  ICD-10  ICD-9  HCPCS | 99406, 99407  F17, F17.2x, O99.33x, T65.22x, Z71.6, Z72.0, Z87.891  305.1, 649.0x, 989.84, V15.82  G0436, G0437, G9016, G9276, G9458, G9902, G9906, G9908, S4995, S9453 |
| **Comedication/Polypharmacy Drug Classes** | | | |
| Gabapentinoids | |  | NDC codes for gabapentin, pregabalin |
| Benzodiazepines | |  | NDC codes for alprazolam, lorazepam, chlordiazepoxide, clobazam, clonazepam, clorazepate, diazepam, estazolam, flurazepam, halazepam, midazolam, oxazepam, quazepam, remimazolam, temazepam, triazolam |
| Skeletal Muscle Relaxants | |  | NDC codes for abotulinumtoxinA, baclofen, carisoprodol, chlorphenesin, chlorzoxazone, cyclobenzaprine, dantrolene, incobutulinumtoxinA, metaxalone, methocarbamol, onabotulinumtoxinA, orphenadrine, prabotulinumtoxinA, rimabotulinumtoxinB, tizanidine |
| Antidepressants | |  | NDC codes for amitriptyline, amoxapine, clomipramine, desipramine, doxepin, imipramine, nortriptyline, protriptyline, trimipramine, duloxetine, desvenlafaxine, levomilnacipran, milnacipran, venlafaxine |
| Abbreviations: CPT=Current Procedural Terminology; HCPCS= Healthcare Common Procedure Coding System; ICD-9= International Classification of Diseases, Ninth Revision; ICD-10= International Classification of Diseases, Tenth Revision; Spinal cord stimulation=SCS; Complex regional pain syndrome=CRPS; NDC= National Drug Code | | | |

**Supplemental Table 2.** Opioid medication MME conversion factors.

| **Name** | **Form** | **Strength** | **Conversion Factor** | **Source** | |
| --- | --- | --- | --- | --- | --- |
| Alfentanil | SC | mg/mL | 30 | Palliative Care guidelines 2016 | |
| Buprenorphine | Film, ER film | mcg/hr | 12.6 | CDC 2018 and CMS 2017 | |
| Buprenorphine | IV/SC, solution | mg/mL | 33 | Buprenorphine label | |
| Buprenorphine | Tablet | mg | 30 | CMS 2017 | |
| Butorphanol | IV/SC, solution, spray | mg/mL | 7 | CDC 2018 | |
| Codeine | Tablet, capsule | mg | 0.15 | CDC 2018 | |
| Codeine | IV/SC, solution | mg/mL | 0.15 | CDC 2018 | |
| Fentanyl | Tablet, solution, lozenge | mcg | 0.13 | CDC 2018 | |
| Fentanyl | IV, SC, solution | mcg/mL | 0.13 | CDC 2018 (consistent with other routes of administration) | |
| Fentanyl | Nasal spray | mcg/inh | 0.16 | CDC 2018 | |
| Fentanyl | Film, ER film | mcg | 0.18 | CDC 2018 | |
| Fentanyl | Patch | mcg/hr | 2.4 | CDC 2022 | |
| Hydrocodone | Tablet, ER tablet, capsule, ER capsule | mg | 1 | CDC 2018 | |
| Hydromorphone | Oral, tablet, ER tablet, ER capsule | mg | 4 | CDC 2018 | |
| Hydromorphone | Solution, liquid, IV/SC | mg/mL | 4 | CDC 2018 (consistent with other routes of administration) | |
| Levomethadyl | Oral, IV/SC | mg | 8 | CDC 2018 | |
| Levorphanol | Oral, tablet | mg | 11 | CDC 2018 | |
| Levorphanol | IV/SC | mg/mL | 11 | CDC 2018 (consistent with other routes of administration) | |
| Meperidine | Oral, tablet | mg | 0.1 | CDC 2018 | |
| Meperidine | Syrup | mg/mL | 0.1 | CDC 2018 | |
| Meperidine | IV/SC, solution | mg/mL | 0.1 | CDC 2018 (consistent with other routes of administration) | |
| Methadone | Tablet, dispersible tablet, | mg | 3 | CDC 2018 | |
| Methadone | Solution | mg/mL | 3 | CDC 2018 | |
| Methadone | Concentrate | mg/mL | 3 | CDC 2018 (consistent with other routes of administration) | |
| Nalbuphine | Solution | mg/mL | 3 | Nielsen 2015 | |
| Oliceridine | IV | mg | 5 | Medscape | |
| Opium | Oral | mg | 1 | CDC 2018 | |
| Oxycodone | Capsule, ER capsule, tablet, ER tablet | mg | 1.5 | CDC 2018 | |
| Oxycodone | Concentrate, solution | mg/mL | 1.5 | CDC 2018 | |
| Oxymorphone | Tablet, ER tablet | mg | 3 | CDC 2018 | |
| Oxymorphone | Suppository | mg | 3 | CDC 2018 (consistent with other routes of administration) | |
| Pentazocine | Solution | mg/mL | 0.37 | CDC 2018 | |
| Propoxyphene | Capsule, tablet | mg | 0.23 | CDC 2018 | |
| Tapentadol | Tablet, ER tablet | mg | 0.4 | CDC 2018 | |
| Tramadol | ER capsule, tablet, ER tablet | mg | 0.1 | CDC 2018 | |
|  |  |  |  |  | |
| Abbreviations: Subcutaneous=SC; Extended release=ER; Intravenous=IV | | | | |
|  |  |  |  |  | |
|  |  |  |  |  | |
